# Supplementary material for: The hypoxia factor Hif-1α controls neural crest chemotaxis and epithelial to mesenchymal transition
Source: PubMed Central journal article supplement — J Cell Biol. 2013 May 27;201(5):759–76. doi: 10.1083/jcb.201212100 (PMC3664719; doi:10.1083/jcb.201212100), 2013-05-27
Supplement: supp_jcb.201212100_JCB_201212100_sm.pdf [file supp_jcb.201212100_JCB_201212100_sm.pdf]

Barriga et al., <http://www.jcb.org/cgi/content/full/jcb.201212100/DC1>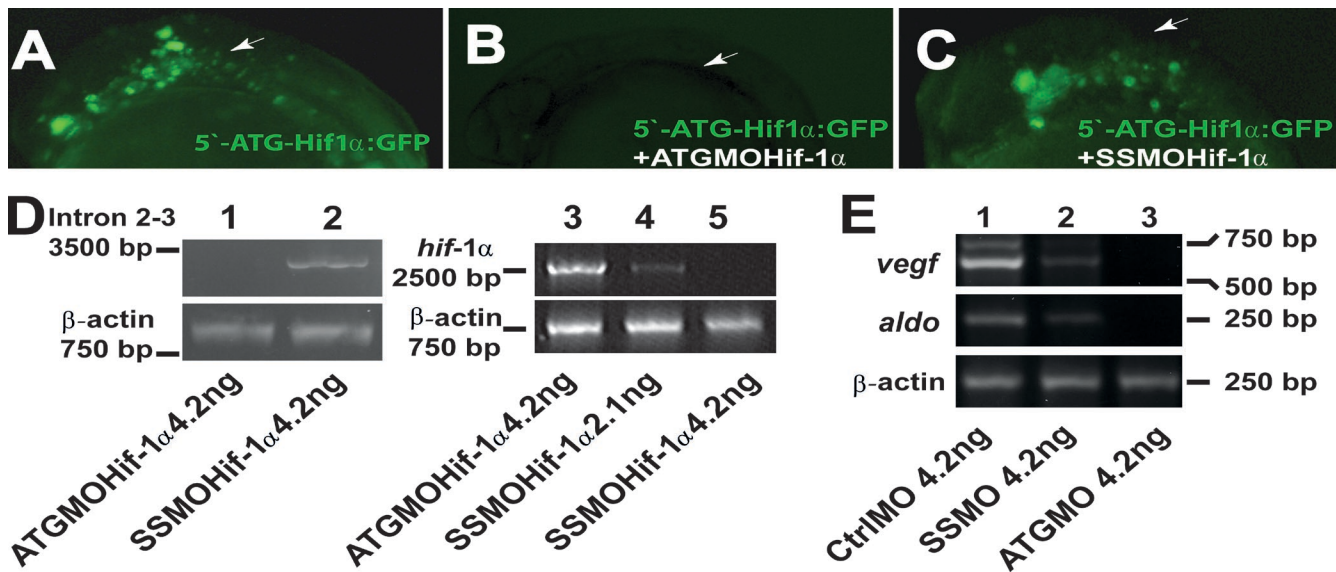

Figure S1. **Specificity of the antisense MOs against Hif-1 $\alpha$ .** (A–C) Fluorescent images of zebrafish embryos injected with mRNA encoding a 5' ATG-Hif-1 $\alpha$ -GFP fusion protein. Note that injection of ATGMOHif-1 $\alpha$  (B), but not of SSMOHif-1 $\alpha$  (C), reduces GFP fluorescence. Arrows show injected cells. (D) RT-PCR of *hif-1 $\alpha$*  to analyze SSMOHif-1 $\alpha$  efficiency. RT-PCR to amplify a region of intron 2–3. No intron is present in embryos injected with ATGMOHif-1 $\alpha$  (lane 1), but it can be detected in embryos injected with SSMOHif-1 $\alpha$  (lane 2); RT-PCR to amplify a region of *hif-1 $\alpha$*  mRNA spanning intron 2–3. Note that the normal-sized band is seen only in lane 3 (ATGMOHif-1 $\alpha$ ) but not in lanes 4 or 5 (SSMOHif-1 $\alpha$ ). (E) RT-PCR of the known Hif-1 $\alpha$  targets *veg* and *aldo*. Ctrl, control.

## Zebrafish Induction

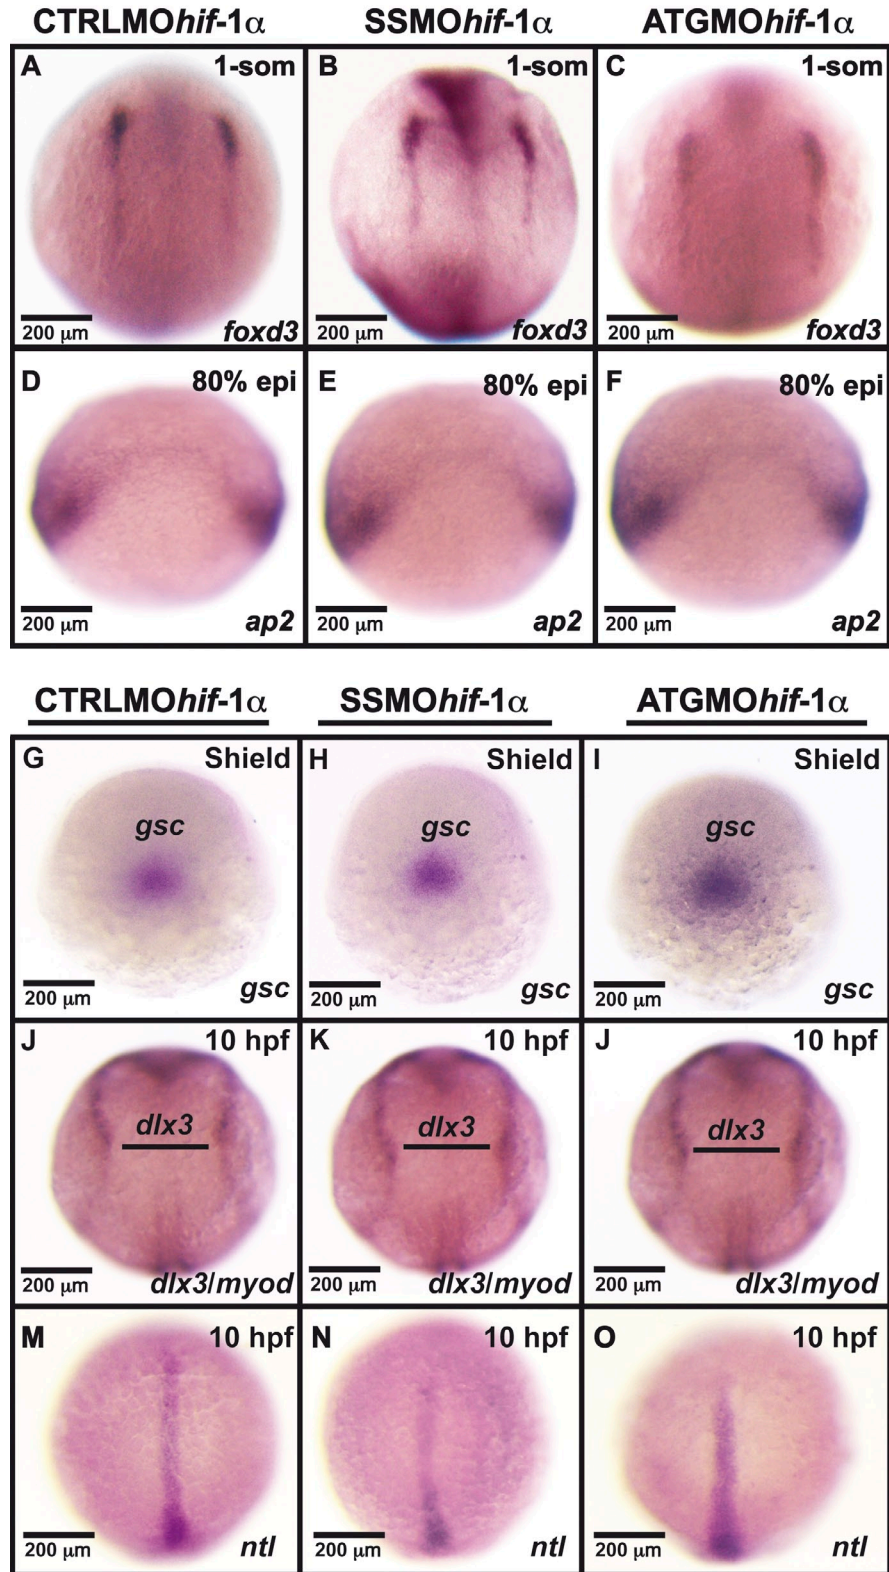

Figure S2. **Hif-1 $\alpha$  is required for neural crest migration but not for neural crest, mesoderm, or placode induction.** (A–F) Neural crest induction. Dorsal view of *foxd3* (A–C) and lateral view of *ap2* (D–F) expression, under the indicated treatments. (G–O) Mesoderm and placode formation. Dorsal view of zebrafish embryos using different mesodermal and ectodermal markers and under different treatments as indicated. CTRL, control; hpf, hours postfertilization; som, somite; epi, epiboly.

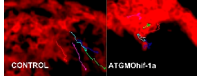

Video 1. **Hif-1 $\alpha$  is required for normal migration of zebrafish neural crest.** Live imaging of zebrafish transgenic embryos *Tg(sox10:mRFP)* expressing membrane-RFP in the neural crest was performed. Normal neural crest migration of embryos injected with a control MO was severely affected by injection of ATGMO*hif-1 $\alpha$* . Leader cells were manually tracked using ImageJ. Zebrafish embryos were filmed by time-lapse microscopy using a confocal microscope (LSM 710; Carl Zeiss) equipped with a motorized stage with a 20 $\times$  objective lens. Frames were taken every 5 min for 300 min.

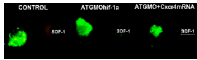

Video 2. **Hif-1 $\alpha$  is required for *Cxcr4*/SDF-1-dependent chemotaxis.** *Xenopus* neural crest explants were cultured on fibronectin and exposed to a localized source of SDF-1. Time-lapse microscopy we performed using an upright microscope (DMX6000; Leica) equipped with a motorized stage (Prior Scientific) with 20 $\times$  objective lens. Frames were taken every 5 min for 300 min.

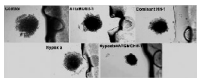

Video 3. **Activation of Hif-1 $\alpha$  promotes neural crest cell dispersion and blocks chemotaxis.** *Xenopus* neural crest explants were cultured on fibronectin and exposed to a localized source of SDF-1. Treatments as indicated. Time-lapse microscopy was performed using an upright microscope (DMX6000; Leica) equipped with a motorized stage (Prior Scientific) with 20 $\times$  objective lens. Frames were taken every 5 min for 300 min.

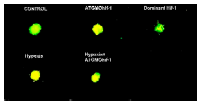

Video 4. **Hif-1 $\alpha$  is required for normal neural crest cell dispersion.** *Xenopus* neural crest explants were cultured on fibronectin. Treatments as indicated. We performed time-lapse microscopy using an upright microscope (DMX6000; Leica) equipped with a motorized stage (Prior Scientific) with 20 $\times$  objective lens. Frames were taken every 5 min for 300 min.

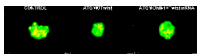

Video 5. **Hif-1 $\alpha$  controls neural crest dispersion in a *Twist*-dependent manner.** *Xenopus* neural crest explants were cultured on fibronectin. Treatments as indicated. Time-lapse microscopy was performed using an upright microscope (DMX6000; Leica) equipped with a motorized stage (Prior Scientific) with 20 $\times$  objective lens. Frames were taken every 5 min for 300 min.
